# Supplementary material for: The reduction of miR146b-5p in monocytes and T cells could contribute to the immunopathogenesis of hepatitis C virus infection
Source: PubMed Central journal article supplement (PMC6746729; doi:10.1038/s41598-019-49706-9), 2019-09-16
Supplement: 41598_2019_49706_MOESM1_ESM.pdf [file 41598_2019_49706_MOESM1_ESM.pdf]

Supplemental materials

**The reduction of miR146b-5p in monocytes and T cells could contribute to the immunopathogenesis of hepatitis C virus infection**

Yasuteru Kondo<sup>1,4\*</sup>, Takayuki Kogure<sup>2</sup>, Masashi Ninomiya<sup>2</sup>, Ryo Fukuda<sup>1</sup>, Norikazu Monma<sup>3</sup>,  
Kazuho Ikeo<sup>3</sup>, Yasuhito Tanaka<sup>4</sup>

1. Department of Hepatology, Sendai Kousei Hospital

4-15 Hirose, Aoba, Sendai City, Miyagi, Japan

2. Division of Gastroenterology, Tohoku University Hospital

1-1 Seiryō, Aoba, Sendai City, Miyagi, Japan

3. Center for information Biology, National Institute of Genetics, Mishima, Japan

4. Department of Virology & Liver unit

Nagoya City University Graduate School of Medical Sciences,

Kawasumi, Mizuho, Nagoya 467-8601, Japan.

Corresponding Author

Yasuteru Kondo MD/PhD

Chief Director

Department of Hepatology

Sendai Kousei Hospital

Telephone: +81-22-222-6181, E-mail: [yasuteru@ebony.plala.or.jp](mailto:yasuteru@ebony.plala.or.jp)

## Supplemental Figures legend

### Supplemental Figure 1

We selected 4 CH-C patients to isolate serum miRNAs and PBMCs miRNAs at the same time. The deep sequence analysis was carried out to quantify both miRNAs. We could detect various miRNAs that were highly expressed in PBMCs by analyzing the ratio between the amounts of serum miRNAs and PBMCs miRNAs. The Y-axis shows the expression of miRNAs in the serum. X-axis shows the expression of miRNAs in PBMCs.

### Supplemental Figure 2

To identify the potential roles of miR-146b, protein-to-protein interactions of the target genes of miR-146b were analyzed. DIANA-TarBase v7.0<sup>1</sup>, a database that indexes experimentally validated microRNA targets, was used to identify the target genes of miR146b. The list of target genes is shown in supplemental table 3. The gene functional classification tool from the Database for Annotation, Visualization and Integrated

Discovery (DAVID) was used to identify enriched gene ontology (GO) terms in the target genes of miR-146b<sup>2</sup>. The protein-to-protein networks of the target genes were analyzed using the String v10 program<sup>3</sup>. The DAVID gene functional classification tool revealed a significant enrichment of several gene ontologies with a *p*-value of less than 0.05. The lists of top 10 gene ontologies are shown in supplemental table 4. Six gene ontologies related to the regulation of cell death and apoptosis were found and one gene ontology related to NF-κB signaling was identified in the biological function category. Four gene ontologies related to vesicles were identified in the cellular component category. Interestingly, network analysis of the target genes of miR-146b using the String v10 program indicated the central involvement of nuclear factor-kappa B (NF-κB) signaling (supplemental figure 2). Taken together, the analyses predicted NF-κB signaling as the most likely candidate that would be modulated by miR-146b in the immune response in HCV infection.

## Reference

1. Vlachos IS, Paraskevopoulou MD, Karagkouni D, Georgakilas G, Vergoulis T, Kanellos I, Anastasopoulos IL, Maniou S, Karathanou K, Kalfakakou D, Fevgas A, Dalamagas T, Hatzigeorgiou AG. DIANA-TarBase v7.0: indexing more than half a million experimentally supported miRNA:mRNA interactions. *Nucleic Acids Res.* 2015 Jan;43(Database issue):D153-9. doi: 10.1093/nar/gku1215.
2. Huang DW, Sherman BT, Lempicki RA. Systematic and integrative analysis of large gene lists using DAVID Bioinformatics Resources. *Nature Protoc.* 2009;4(1):44-57.
3. Szklarczyk D, Franceschini A, Wyder S, Forslund K, Heller D, Huerta-Cepas J, Simonovic M, Roth A, Santos A, Tsafou KP, Kuhn M, Bork P, Jensen LJ, von Mering C. STRING v10: protein-protein interaction networks, integrated over the tree of life. *Nucleic Acids Res.* 2015 Jan; 43:D447-52.

Supplemental Figure 1

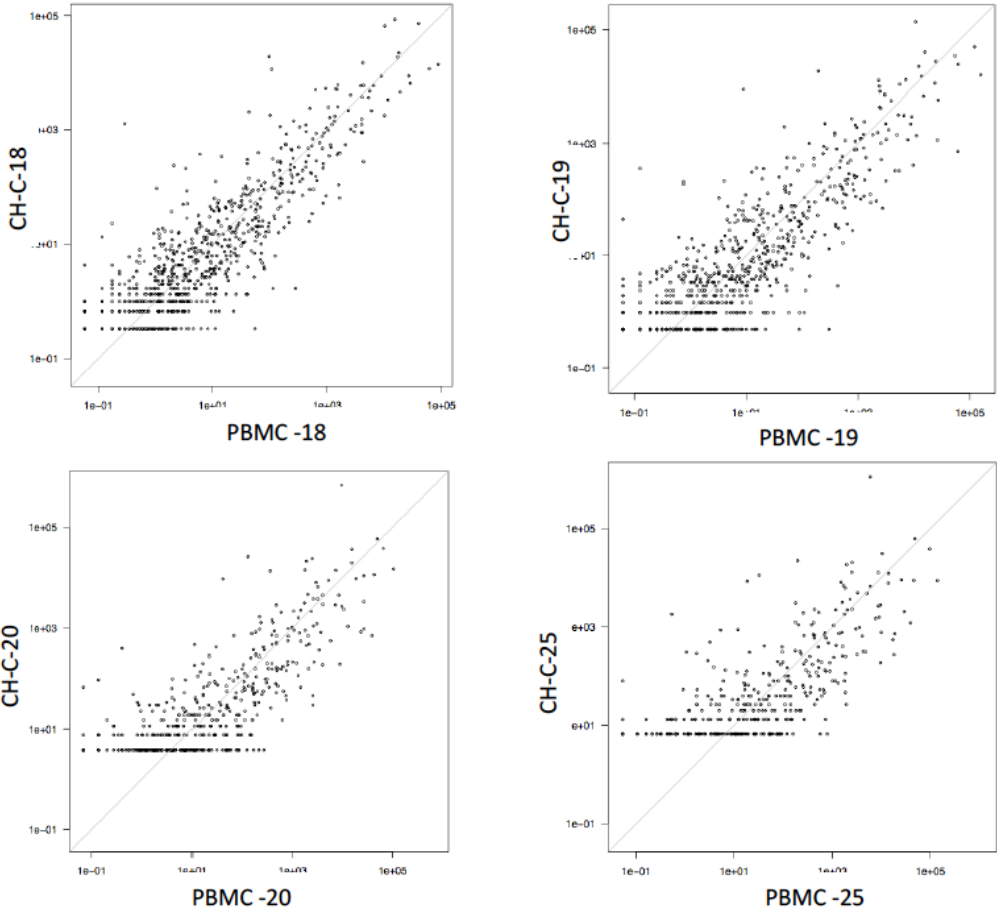

We selected 4 CH-C patients to isolate serum miRNAs and PBMCs miRNAs at the same time. The deep sequence analysis was carried out to quantify both miRNAs. We could detect various miRNAs that were highly expressed in PBMCs by analyzing the ratio between the amounts of serum miRNAs and PBMC miRNAs.

Supplemental Table 1. The various miRNAs that were highly expressed in PBMCs.

| ID              | *PBMC-1  | CH-C-18  | ratio | *PBMC-2   | CH-C-19  | ratio | *PBMC-3   | CH-C-20  | ratio | *PBMC-4   | CH-C-25 | ratio  |
|-----------------|----------|----------|-------|-----------|----------|-------|-----------|----------|-------|-----------|---------|--------|
| hsa-miR-146b-5p | 1662.94  | 64.57    | 25.75 | 3094.33   | 213.20   | 14.51 | 3967.97   | 190.91   | 20.78 | 9631.28   | 186.72  | 51.58  |
| hsa-miR-664-3p  | 487.14   | 24.63    | 19.78 | 445.82    | 30.12    | 14.80 | 730.60    | 45.82    | 15.95 | 557.34    | 53.35   | 10.45  |
| hsa-miR-155-5p  | 865.91   | 52.26    | 16.57 | 2718.33   | 69.31    | 39.22 | 2567.45   | 30.55    | 84.05 | 1929.47   | 26.67   | 72.34  |
| hsa-miR-342-3p  | 4359.98  | 276.27   | 15.78 | 9621.39   | 405.85   | 23.71 | 8781.33   | 194.73   | 45.09 | 18243.76  | 273.41  | 66.73  |
| hsa-miR-142-3p  | 1602.08  | 108.51   | 14.76 | 2122.74   | 93.69    | 22.66 | 2562.18   | 45.82    | 55.92 | 1826.84   | 46.68   | 39.14  |
| hsa-miR-500a-3p | 967.02   | 70.23    | 13.77 | 1684.80   | 87.48    | 19.26 | 470.36    | 53.46    | 8.80  | 1312.35   | 73.35   | 17.89  |
| hsa-miR-3153    | 71.78    | 6.99     | 10.27 | 62.25     | 10.52    | 5.92  | 90.54     | 11.45    | 7.90  | 111.76    | 20.01   | 5.59   |
| hsa-miR-140-5p  | 70.50    | 9.99     | 7.06  | 51.30     | 2.87     | 17.89 | 74.51     | 3.82     | 19.51 | 73.66     | 6.67    | 11.05  |
| hsa-miR-181a-3p | 575.30   | 90.87    | 6.33  | 563.94    | 70.75    | 7.97  | 646.71    | 57.27    | 11.29 | 606.31    | 40.01   | 15.15  |
| hsa-miR-142-5p  | 10153.68 | 1769.44  | 5.74  | 25949.71  | 1142.01  | 22.72 | 23380.71  | 817.11   | 28.61 | 19023.94  | 726.87  | 26.17  |
| hsa-miR-4286    | 493.76   | 90.54    | 5.45  | 396.90    | 35.85    | 11.07 | 365.64    | 26.73    | 13.68 | 783.77    | 6.67    | 117.53 |
| hsa-miR-181a-5p | 61439.96 | 11723.36 | 5.24  | 153745.57 | 15749.56 | 9.76  | 105101.30 | 14734.73 | 7.13  | 140248.21 | 8789.08 | 15.96  |

The various miRNAs that were highly expressed in PBMCs by analyzing the ratio between the amount serum miRNAs and PBMCs miRNAs .

Supplemental Table 2. The various miRNAs that were highly expressed in serum.

| <b>ID</b>         | <b>*PBMC-1</b> | <b>CH-C-18</b> | <b>ratio</b> | <b>*PBMC-2</b> | <b>CH-C-19</b> | <b>ratio</b> | <b>*PBMC-3</b> | <b>CH-C-20</b> | <b>ratio</b> | <b>*PBMC-4</b> | <b>CH-C-25</b> | <b>ratio</b> |
|-------------------|----------------|----------------|--------------|----------------|----------------|--------------|----------------|----------------|--------------|----------------|----------------|--------------|
| hsa-miR-122-5p    | 0.00           | 1171.64        | 0.00         | 0.00           | 1242.87        | 0.00         | 0.00           | 1057.66        | 0.00         | 0.00           | 4274.51        | 0.00         |
| hsa-miR-3591-3p   | 0.00           | 283.92         | 0.00         | 0.13           | 352.78         | 0.00         | 0.00           | 320.74         | 0.00         | 0.00           | 920.25         | 0.00         |
| hsa-miR-3591-5p   | 0.00           | 7.32           | 0.00         | 0.00           | 2.39           | 0.00         | 0.00           | 3.82           | 0.00         | 0.00           | 13.34          | 0.00         |
| hsa-miR-4732-3p   | 0.00           | 39.28          | 0.00         | 0.06           | 44.46          | 0.00         | 0.14           | 95.46          | 0.00         | 0.05           | 80.02          | 0.00         |
| hsa-miR-483-3p    | 0.00           | 28.29          | 0.00         | 0.38           | 5.26           | 0.07         | 0.89           | 30.55          | 0.03         | 0.00           | 46.68          | 0.00         |
| hsa-miR-375       | 0.29           | 1285.14        | 0.00         | 0.75           | 205.07         | 0.00         | 0.41           | 381.83         | 0.00         | 0.53           | 1840.51        | 0.00         |
| hsa-miR-451a      | 96.81          | 19227.50       | 0.01         | 8.88           | 8634.61        | 0.00         | 352.84         | 13398.33       | 0.03         | 32.61          | 11363.12       | 0.00         |
| hsa-miR-483-5p    | 0.17           | 22.97          | 0.01         | 0.00           | 33.94          | 0.00         | 0.07           | 68.73          | 0.00         | 0.00           | 26.67          | 0.00         |
| hsa-miR-4732-5p   | 0.12           | 13.31          | 0.01         | 0.00           | 8.13           | 0.00         | 0.21           | 15.27          | 0.01         | 0.05           | 13.34          | 0.00         |
| hsa-miR-144-3p    | 2.09           | 238.32         | 0.01         | 0.75           | 184.52         | 0.00         | 10.75          | 187.10         | 0.06         | 1.06           | 306.75         | 0.00         |
| hsa-miR-10b-5p    | 107.38         | 11406.16       | 0.01         | 193.63         | 18668.88       | 0.01         | 128.82         | 25937.55       | 0.00         | 194.66         | 22412.83       | 0.01         |
| hsa-miR-885-5p    | 1.05           | 95.20          | 0.01         | 1.13           | 13.86          | 0.08         | 0.68           | 49.64          | 0.01         | 1.69           | 293.41         | 0.01         |
| hsa-miR-215       | 3.37           | 213.02         | 0.02         | 6.38           | 53.06          | 0.12         | 7.60           | 95.46          | 0.08         | 6.02           | 80.02          | 0.08         |
| hsa-miR-144-5p    | 5.98           | 373.79         | 0.02         | 4.00           | 213.20         | 0.02         | 29.17          | 416.19         | 0.07         | 3.22           | 493.47         | 0.01         |
| hsa-miR-486-3p    | 42.86          | 2015.08        | 0.02         | 48.05          | 1964.21        | 0.02         | 40.06          | 9316.59        | 0.00         | 18.36          | 8489.00        | 0.00         |
| hsa-miR-183-5p    | 3.54           | 86.21          | 0.04         | 3.25           | 105.64         | 0.03         | 3.97           | 64.91          | 0.06         | 2.90           | 206.72         | 0.01         |
| hsa-miR-100-5p    | 14.34          | 339.18         | 0.04         | 9.70           | 119.03         | 0.08         | 21.30          | 282.55         | 0.08         | 12.03          | 893.58         | 0.01         |
| hsa-miR-30a-5p    | 100.12         | 1782.75        | 0.06         | 135.20         | 990.95         | 0.14         | 233.06         | 1260.03        | 0.18         | 255.19         | 1927.20        | 0.13         |
| hsa-miR-145-3p    | 1.10           | 17.97          | 0.06         | 1.06           | 19.60          | 0.05         | 1.44           | 30.55          | 0.05         | 1.58           | 13.34          | 0.12         |
| hsa-miR-125b-1-3p | 0.46           | 4.99           | 0.09         | 0.06           | 3.82           | 0.02         | 1.10           | 11.45          | 0.10         | 0.47           | 13.34          | 0.04         |
| hsa-miR-4507      | 0.64           | 4.99           | 0.13         | 0.44           | 5.74           | 0.08         | 0.34           | 3.82           | 0.09         | 0.63           | 6.67           | 0.09         |
| hsa-miR-4486      | 0.17           | 1.33           | 0.13         | 0.94           | 5.26           | 0.18         | 0.00           | 3.82           | 0.00         | 0.16           | 6.67           | 0.02         |
| hsa-miR-182-5p    | 150.53         | 1143.34        | 0.13         | 256.51         | 2246.73        | 0.11         | 218.61         | 1626.59        | 0.13         | 178.15         | 3100.85        | 0.06         |
| hsa-miR-485-3p    | 40.36          | 299.90         | 0.13         | 15.08          | 360.91         | 0.04         | 10.82          | 458.19         | 0.02         | 5.28           | 880.24         | 0.01         |
| hsa-miR-3130-3p   | 0.46           | 3.33           | 0.14         | 0.69           | 3.82           | 0.18         | 0.27           | 11.45          | 0.02         | 0.16           | 13.34          | 0.01         |
| hsa-miR-654-3p    | 62.90          | 397.42         | 0.16         | 20.58          | 349.44         | 0.06         | 7.12           | 53.46          | 0.13         | 5.33           | 53.35          | 0.10         |
| hsa-miR-5010-5p   | 2.50           | 15.64          | 0.16         | 4.69           | 75.53          | 0.06         | 2.47           | 15.27          | 0.16         | 1.69           | 40.01          | 0.04         |
| hsa-miR-4432      | 1.97           | 11.98          | 0.16         | 0.63           | 21.03          | 0.03         | 0.82           | 34.36          | 0.02         | 0.95           | 13.34          | 0.07         |
| hsa-miR-486-5p    | 15274.34       | 85763.18       | 0.18         | 10648.73       | 137545.17      | 0.08         | 9490.43        | 687950.26      | 0.01         | 5973.69        | 1140300.22     | 0.01         |

The various miRNAs that were highly expressed in serum by analyzing the ratio between the amounts of serum miRNAs and PBMCs miRNAs

Supplemental Figure 2

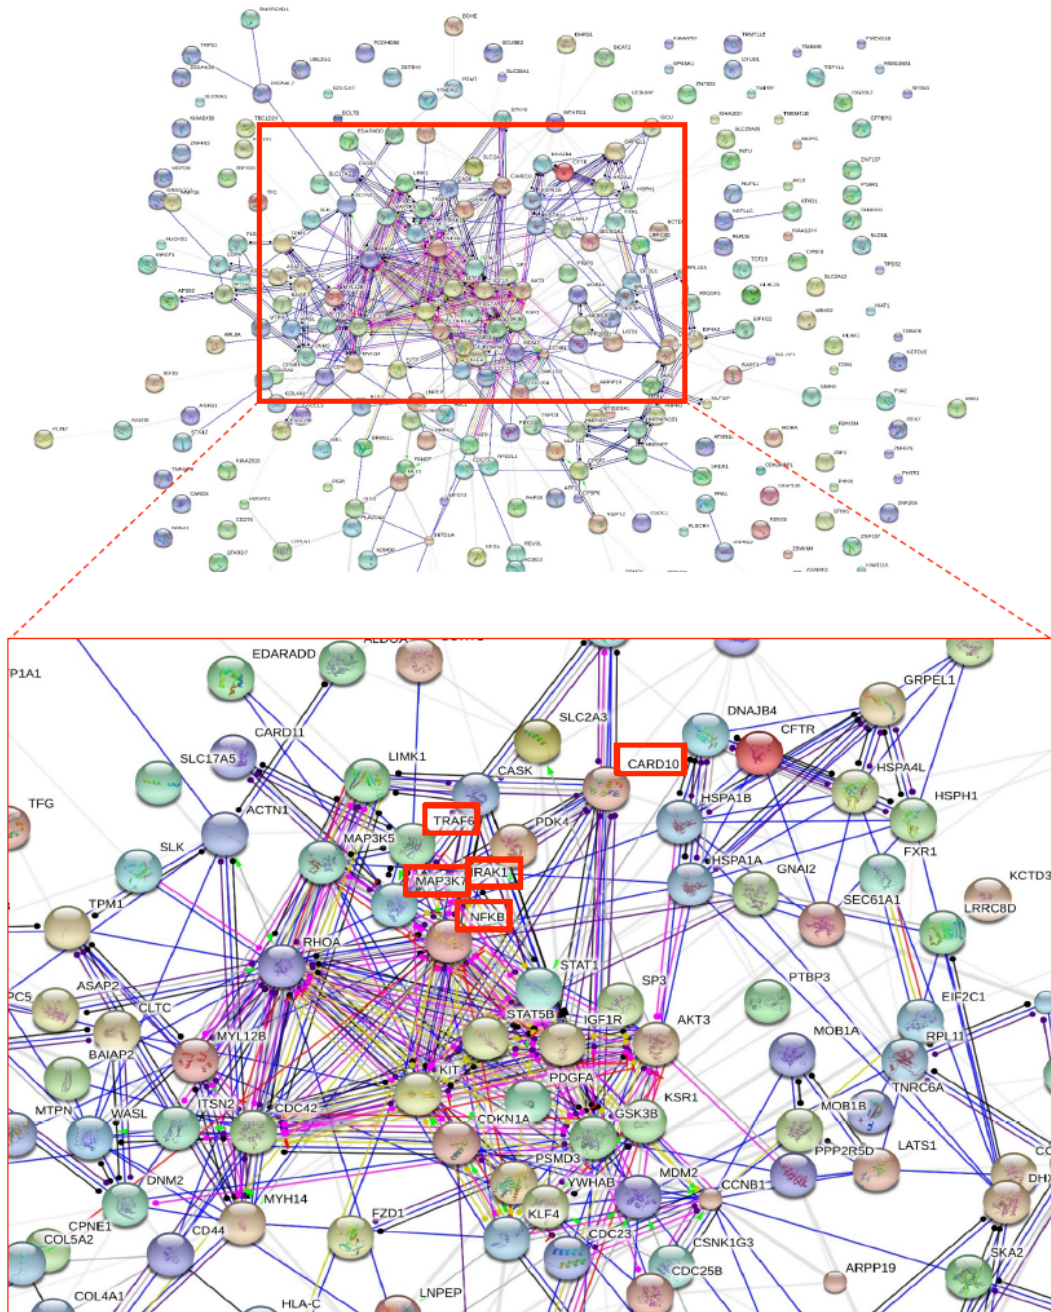



Supplemental Table 3. Target genes of miR14b-5p (DIANA-TarBase v7.0)

| Gene symbol | Gene ID | Gene symbol | Gene ID | Gene symbol | Gene ID | Gene symbol | Gene ID | Gene symbol | Gene ID |
|-------------|---------|-------------|---------|-------------|---------|-------------|---------|-------------|---------|
| PEAK1       | 79834   | ACTN1       | 87      | PPP2R5D     | 5528    | CARD8       | 22900   | NSFL1C      | 55968   |
| U2SURP      | 23350   | CFTR        | 1080    | MTHFD1      | 4522    | ARPP19      | 10776   | CARD11      | 84433   |
| PHF20L1     | 51105   | MTPN        | 136319  | UBN2        | 254048  | ZNF597      | 146434  | SESN3       | 143686  |
| CLTC        | 1213    | BCL7B       | 9275    | ABRACL      | 58527   | GPANK1      | 7918    | HIAT1       | 64645   |
| LIMK1       | 3984    | LNPEP       | 4012    | MAP3K5      | 4217    | NR6A1       | 2649    | BCLAF1      | 9774    |
| RAB18       | 22931   | GINS1       | 9837    | EIF4G2      | 1982    | ING3        | 54556   | KIAA1244    | 57221   |
| PLA1A       | 51365   | CD276       | 80381   | TMBIM6      | 7009    | CDC25B      | 994     | PJA2        | 9867    |
| STIM1       | 6786    | SPEN        | 23013   | MDM2        | 4193    | EIF4A3      | 9775    | AKT3        | 10000   |
| TRMT112     | 51504   | ABHD17B     | 51104   | ZC3H10      | 84872   | MEA1        | 4201    | CDC73       | 79577   |
| RPL11       | 6135    | C1RL        | 51279   | MAML1       | 9794    | BCAT2       | 587     | TXLNG       | 55787   |
| TNFAIP8     | 25816   | LRRC36      | 55282   | STK40       | 83931   | LTA4H       | 4048    | HSPA4L      | 22824   |
| TMEM216     | 51259   | PHTF2       | 57157   | SLC25A33    | 84275   | WASL        | 8976    | ZNF823      | 55552   |
| BLOC1S2     | 282991  | GOLGA7      | 51125   | CPNE8       | 144402  | TNPO1       | 3842    | RORA        | 4919    |
| PLS3        | 5358    | SLC2A3      | 6515    | NUPL1       | 9818    | ETAA1       | 54465   | SREK1       | 140890  |
| ATP1A1      | 476     | ITSN2       | 50618   | MAP3K7      | 6885    | BRMS1L      | 25855   | DHX8        | 1659    |
| SART3       | 9733    | FAM160A1    | 729830  | DCAF16      | 54876   | OTUD1       | 220213  | CDK5RAP1    | 51654   |
| BAIAP2      | 10458   | ABHD2       | 11057   | LATS1       | 9113    | GSK3B       | 2932    | WDR36       | 134430  |
| CCL3        | 6348    | ZNF107      | 51427   | DNAJB4      | 11080   | SLC38A1     | 6303    | TRAF6       | 7189    |
| ATR         | 545     | STAT5B      | 6777    | FAM111A     | 63901   | EPB41L4A    | 64097   | SLC19A2     | 10560   |
| CSDE1       | 7812    | IGF1R       | 3480    | PTAR1       | 375743  | SLK         | 2534    | FBXO28      | 23219   |
| CD84        | 8832    | AGFG1       | 3267    | NUPL2       | 11097   | Scube2      | 57758   | AGO1        | 26523   |
| MACF1       | 23499   | MOB1B       | 92597   | ZNF367      | 195828  | HSPA1A      | 3303    | YTHDF2      | 51441   |
| PAPD5       | 64282   | SP3         | 6670    | STAT1       | 6772    | TMPPE       | 643853  | ZNF676      | 163223  |
| PSMD3       | 5709    | KIAA0430    | 9665    | COPA        | 1314    | MMP16       | 4325    | SOGA1       | 140710  |
| ASAP2       | 8853    | CPSF6       | 11052   | OGFOD1      | 55239   | NFKB1       | 4790    | FBXO34      | 55030   |
| PDGFA       | 5154    | PBX1        | 5087    | ZNF92       | 168374  | MYL12B      | 103910  | ICE1        | 23379   |
| CD44        | 960     | PPRC1       | 23082   | AP3S2       | 10239   | ZNF197      | 10168   | KBTD6       | 89890   |
| LYPLA1      | 10434   | EXOC6B      | 23233   | GRPEL1      | 80273   | PLA2G4A     | 5321    | MID1        | 4281    |
| KLF4        | 9314    | CPSF2       | 53981   | CDC23       | 8697    | CASK        | 8573    | HSPH1       | 10808   |
| SETD1A      | 9739    | SORT1       | 4877    | FANCF       | 2188    | ZNF43       | 7594    | SNRNP27     | 11017   |
| ATP5G2      | 517     | KIF1B       | 23095   | JADE2       | 23338   | ATAD1       | 84896   | YWHAB       | 7529    |
| USP33       | 23032   | CPNE1       | 1369    | PIGB        | 9488    | BCL2L13     | 23786   | KIAA2018    | 205717  |
| PHKB        | 5257    | DNM2        | 1785    | NLGN1       | 22871   | DNPH1       | 10591   | ZSCAN29     | 146050  |
| DDX26B      | 203522  | RFXS        | 5993    | IQCE        | 23288   | POMT2       | 29954   | RHPN2       | 85415   |
| ATP13A3     | 79572   | NUCKS1      | 64710   | FXR1        | 8087    | ZNF3        | 7551    | IER2        | 9592    |
| IRAK1       | 3654    | KSR1        | 8844    | TCF20       | 6942    | ISCU        | 23479   | KLHL20      | 27252   |
| KMT2E       | 55904   | ARL8A       | 127829  | RBM26       | 64062   | CENPU       | 79682   | SERPINB9    | 5272    |
| SLC2A12     | 154091  | CCNB1       | 891     | RBL1        | 5542    | TFG         | 10342   | TRPS1       | 7227    |
| RHBDD1      | 84236   | ADAM10      | 102     | DHRS1       | 115817  | KIT         | 3815    | GMFB        | 2764    |
| KCTD15      | 79047   | KIAA0754    | 643314  | GTPBP3      | 84705   | MDFIC       | 29969   | PGM1        | 5236    |
| HNRNPA2B1   | 3181    | RASSF5      | 83593   | ELMSAN1     | 91748   | PLIN2       | 123     | P2RX5       | 5026    |
| PPA1        | 5464    | AFF1        | 4299    | TP53INP1    | 94241   | MR1         | 3140    | CSNK1G3     | 1456    |
| AVL9        | 23080   | HLA-C       | 3107    | PAFAH2      | 5051    | RHOA        | 387     | HNRNPD      | 3184    |
| TNRC6A      | 27327   | ALDOA       | 226     | ZNF493      | 284443  | PRPF8       | 10594   | ATXN1L      | 342371  |
| EDARADD     | 128178  | HNRNPF      | 3185    | TBC1D24     | 57465   | CARD10      | 29775   | PDK4        | 5166    |
| RAD54L2     | 23132   | INTU        | 27152   | BTG2        | 7832    | DDHD1       | 80821   | MMGT1       | 93380   |

Supplemental Table 4. Top 10 gene ontologies identified in the target genes of miR146b-5p

| <b>Biological function</b>                       |                 |
|--------------------------------------------------|-----------------|
| Gene ontology term                               | <i>p</i> -value |
| regulation of programmed cell death              | 3.69E-07        |
| regulation of cell death                         | 4.02E-07        |
| regulation of apoptosis                          | 8.77E-07        |
| negative regulation of programmed cell death     | 2.74E-04        |
| negative regulation of cell death                | 2.86E-04        |
| negative regulation of apoptosis                 | 7.23E-04        |
| activation of NF-kappaB-inducing kinase activity | 0.00108989      |
| cellular protein localization                    | 0.001188208     |
| intracellular protein transport                  | 0.001257681     |
| cellular macromolecule localization              | 0.001271843     |
| <b>Cellular component</b>                        |                 |
| Gene ontology term                               | <i>p</i> -value |
| nuclear lumen                                    | 7.19E-05        |
| organelle lumen                                  | 4.72E-04        |
| intracellular organelle lumen                    | 5.77E-04        |
| membrane-enclosed lumen                          | 7.10E-04        |
| nucleoplasm                                      | 0.001111336     |
| membrane-bounded vesicle                         | 0.00229947      |
| nucleolus                                        | 0.00370583      |
| cytoplasmic membrane-bounded vesicle             | 0.004065685     |
| vesicle                                          | 0.005384863     |
| cytoplasmic vesicle                              | 0.007795455     |
| <b>Molecular function</b>                        |                 |
| Gene ontology term                               | <i>p</i> -value |
| cytoskeletal protein binding                     | 0.001553715     |
| nucleotide binding                               | 0.002700479     |
| RNA binding                                      | 0.006939658     |
| caspase regulator activity                       | 0.011474242     |
| cation binding                                   | 0.018389259     |
| ion binding                                      | 0.01878988      |
| carboxylesterase activity                        | 0.020436556     |
| metal ion binding                                | 0.020653403     |
| protein kinase activity                          | 0.021020565     |
| tubulin binding                                  | 0.023904927     |
